# Supplementary material for: Auditory Pitch Perception in Autism Spectrum Disorder: A Systematic Review and Meta-Analysis
Source: Preprints.org preprint supplement (doi:10.20944/preprints202206.0212.v1), 2022-06-15
Supplement: Supplementary file 1 [file supplementary]

Supplemental Figure 1-4

**Supplemental Figure 1.** Results of leave-one-out sensitivity analysis sorted by heterogeneity ( $I^2$ ). The shaded area with a dashed line in its center represents the estimated pooled effect and its 95% confidence interval of included studies.

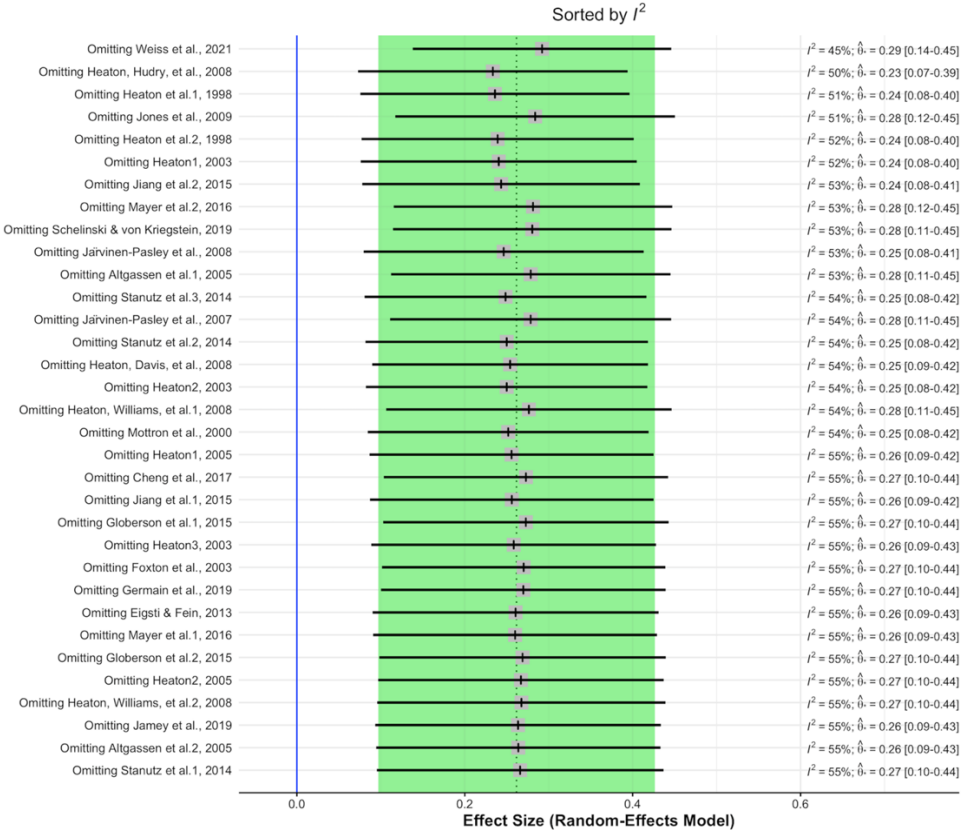

**Supplemental Figure 2.** Forest plot after removing outliers. Forest plot with effect size (Hedge’s g) and confidence intervals for included studies after the removal of three outliers. Grey squares depict individual effect sizes of pitch processing in ASD compared with TD, with sizes indicating the relative weight of each study’s effect size estimate to the analysis. Black diamond reflects the overall pooling effect across studies.

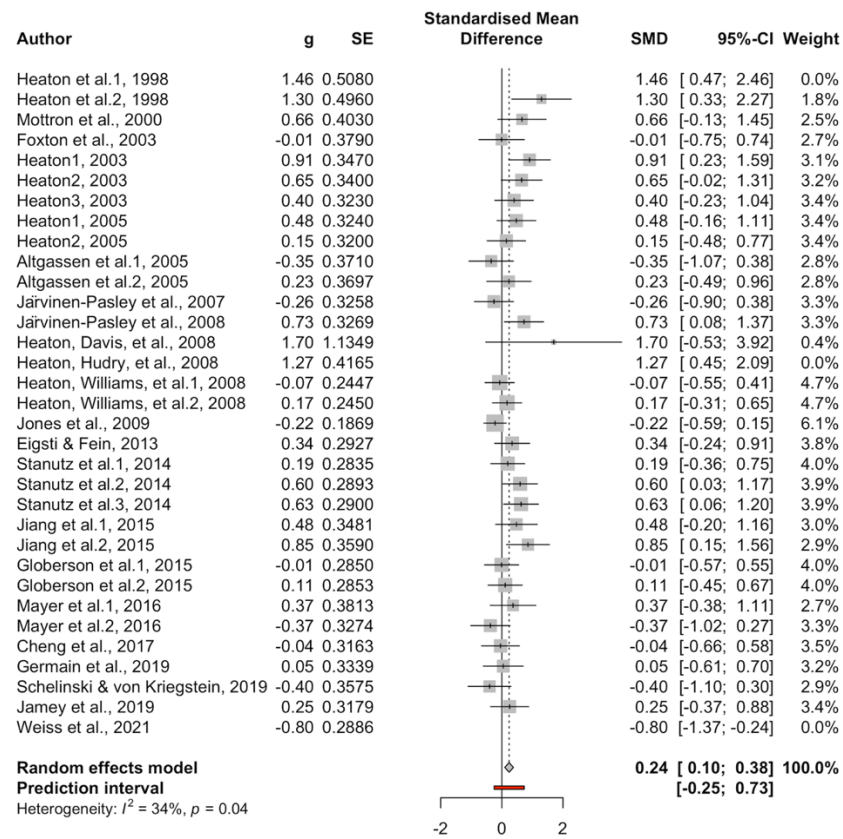

**Supplemental Figure 3.** Contour-enhanced meta-analysis funnel plots.

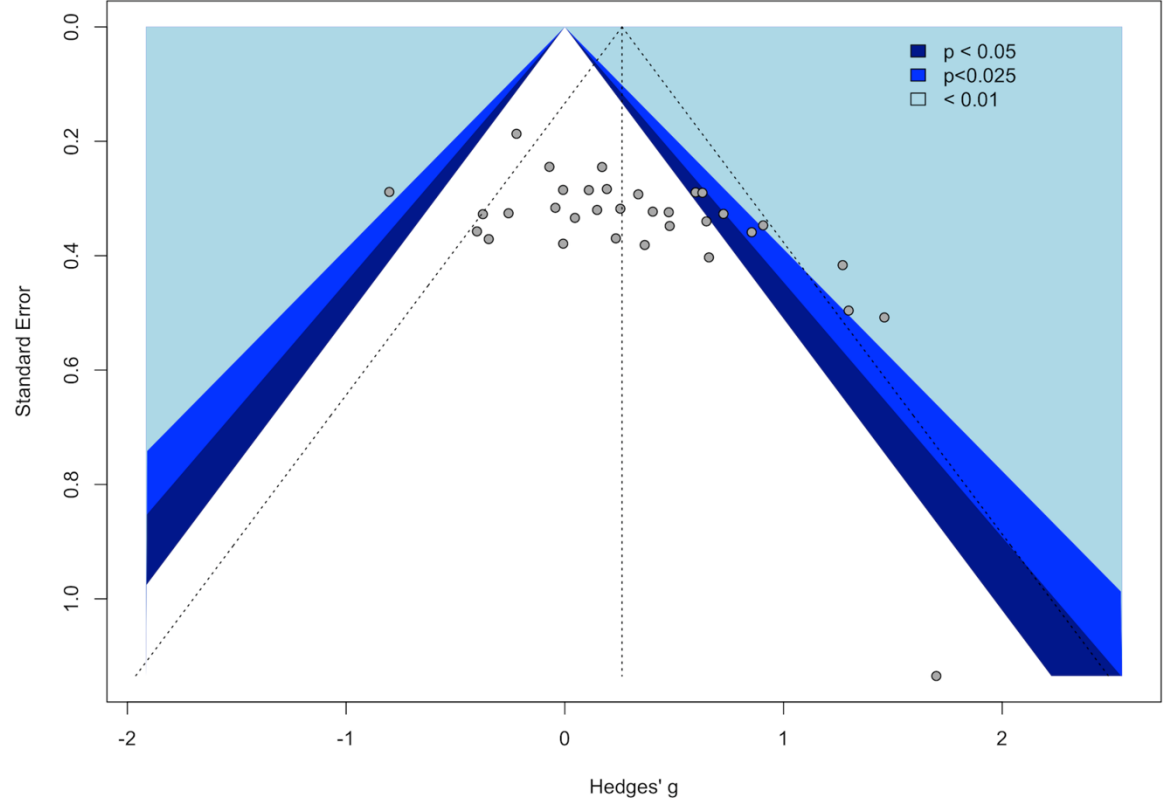

**Supplemental Figure 4.** Funnel plot. The effect size for each study (Hedges  $g$ ) is plotted against the standard error. Filled circles indicate studies in the meta-analysis. Open circles indicate studies imputed in the trim-and-fill analysis.

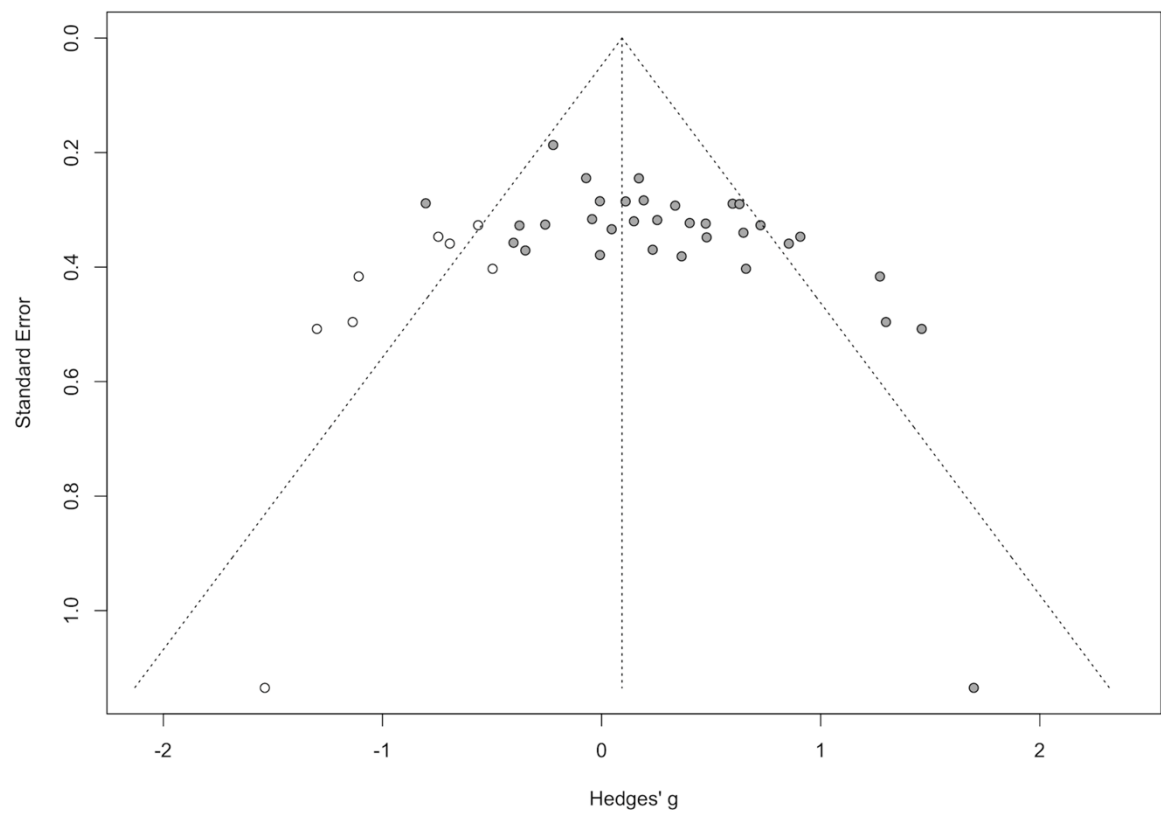

Supplemental Table 1-4

Supplemental Table 1. PRISMA checklist.

| Section/topic             | # | Checklist item                                                                                                                                                                                                                                                                                              | Reported on page # |
|---------------------------|---|-------------------------------------------------------------------------------------------------------------------------------------------------------------------------------------------------------------------------------------------------------------------------------------------------------------|--------------------|
| TITLE                     |   |                                                                                                                                                                                                                                                                                                             |                    |
| Title                     | 1 | Identify the report as a systematic review, meta-analysis, or both.                                                                                                                                                                                                                                         | 1                  |
| ABSTRACT                  |   |                                                                                                                                                                                                                                                                                                             |                    |
| Structured summary        | 2 | Provide a structured summary including, as applicable: background; objectives; data sources; study eligibility criteria, participants, and interventions; study appraisal and synthesis methods; results; limitations; conclusions and implications of key findings; systematic review registration number. | 3-4                |
| INTRODUCTION              |   |                                                                                                                                                                                                                                                                                                             |                    |
| Rationale                 | 3 | Describe the rationale for the review in the context of what is already known.                                                                                                                                                                                                                              | 4-9                |
| Objectives                | 4 | Provide an explicit statement of questions being addressed with reference to participants, interventions, comparisons, outcomes, and study design (PICOS).                                                                                                                                                  | 9                  |
| METHODS                   |   |                                                                                                                                                                                                                                                                                                             |                    |
| Protocol and registration | 5 | Indicate if a review protocol exists, if and where it can be accessed (e.g., Web address), and, if available, provide registration information including registration number.                                                                                                                               | N/A                |
| Eligibility criteria      | 6 | Specify study characteristics (e.g., PICOS, length of follow-up) and report characteristics (e.g., years considered, language, publication status) used as criteria for eligibility, giving rationale.                                                                                                      | 10-11              |
| Information sources       | 7 | Describe all information sources (e.g., databases with dates of coverage, contact with study authors to identify additional studies) in the search and date last searched.                                                                                                                                  | 12                 |
| Search                    | 8 | Present full electronic search strategy for at least one database, including any limits used, such that it could be repeated.                                                                                                                                                                               | 12                 |

| Section/topic                      | #  | Checklist item                                                                                                                                                                                                         | Reported on page #                 |
|------------------------------------|----|------------------------------------------------------------------------------------------------------------------------------------------------------------------------------------------------------------------------|------------------------------------|
| Study selection                    | 9  | State the process for selecting studies (i.e., screening, eligibility, included in systematic review, and, if applicable, included in the meta-analysis).                                                              | 12                                 |
| Data collection process            | 10 | Describe method of data extraction from reports (e.g., piloted forms, independently, in duplicate) and any processes for obtaining and confirming data from investigators.                                             | 11-12                              |
| Data items                         | 11 | List and define all variables for which data were sought (e.g., PICOS, funding sources) and any assumptions and simplifications made.                                                                                  | 13                                 |
| Risk of bias in individual studies | 12 | Describe methods used for assessing risk of bias of individual studies (including specification of whether this was done at the study or outcome level), and how this information is to be used in any data synthesis. | 13                                 |
| Summary measures                   | 13 | State the principal summary measures (e.g., risk ratio, difference in means).                                                                                                                                          | 13-14                              |
| Synthesis of results               | 14 | Describe the methods of handling data and combining results of studies, if done, including measures of consistency (e.g., $I^2$ ) for each meta-analysis.                                                              | 13-14                              |
| Risk of bias across studies        | 15 | Specify any assessment of risk of bias that may affect the cumulative evidence (e.g., publication bias, selective reporting within studies).                                                                           | 14                                 |
| Additional analyses                | 16 | Describe methods of additional analyses (e.g., sensitivity or subgroup analyses, meta-regression), if done, indicating which were pre-specified.                                                                       | 14                                 |
| <b>RESULTS</b>                     |    |                                                                                                                                                                                                                        |                                    |
| Study selection                    | 17 | Give numbers of studies screened, assessed for eligibility, and included in the review, with reasons for exclusions at each stage, ideally with a flow diagram.                                                        | 15+ Figure 1                       |
| Study characteristics              | 18 | For each study, present characteristics for which data were extracted (e.g., study size, PICOS, follow-up period) and provide the citations.                                                                           | 15-16 +<br>Supplemental<br>Table 2 |
| Risk of bias within studies        | 19 | Present data on risk of bias of each study and, if available, any outcome level assessment (see item 12).                                                                                                              | 15-17+<br>Supplemental             |

| Section/topic                 | #  | Checklist item                                                                                                                                                                                           | Reported on page #   |
|-------------------------------|----|----------------------------------------------------------------------------------------------------------------------------------------------------------------------------------------------------------|----------------------|
|                               |    |                                                                                                                                                                                                          | Table 2              |
| Results of individual studies | 20 | For all outcomes considered (benefits or harms), present, for each study: (a) simple summary data for each intervention group (b) effect estimates and confidence intervals, ideally with a forest plot. | Supplemental Table 3 |
| Synthesis of results          | 21 | Present results of each meta-analysis done, including confidence intervals and measures of consistency.                                                                                                  | 16-17                |
| Risk of bias across studies   | 22 | Present results of any assessment of risk of bias across studies (see Item 15).                                                                                                                          | 17                   |
| Additional analysis           | 23 | Give results of additional analyses, if done (e.g., sensitivity or subgroup analyses, meta-regression [see Item 16]).                                                                                    | 17-18                |
| <b>DISCUSSION</b>             |    |                                                                                                                                                                                                          |                      |
| Summary of evidence           | 24 | Summarize the main findings including the strength of evidence for each main outcome; consider their relevance to key groups (e.g., healthcare providers, users, and policy makers).                     | 18-35                |
| Limitations                   | 25 | Discuss limitations at study and outcome level (e.g., risk of bias), and at review-level (e.g., incomplete retrieval of identified research, reporting bias).                                            | 35-36                |
| Conclusions                   | 26 | Provide a general interpretation of the results in the context of other evidence, and implications for future research.                                                                                  | 35-36                |
| <b>FUNDING</b>                |    |                                                                                                                                                                                                          |                      |
| Funding                       | 27 | Describe sources of funding for the systematic review and other support (e.g., supply of data); role of funders for the systematic review.                                                               | 2                    |

From: Moher D, Liberati A, Tetzlaff J, Altman DG, The PRISMA Group (2009). Preferred Reporting Items for Systematic Reviews and Meta-Analyses: The PRISMA Statement. *PLoS Med* 6(7): e1000097. doi:10.1371/journal.pmed1000097

Supplemental Table 2. Characteristics of studies included in quantitative synthesis.

|      |              |          |                    |                            |                                          | Participant information |                       |               |                               |                        |                                   |                |                |                   |       |              |                       |               |                                    |              |                |                   |       |     |
|------|--------------|----------|--------------------|----------------------------|------------------------------------------|-------------------------|-----------------------|---------------|-------------------------------|------------------------|-----------------------------------|----------------|----------------|-------------------|-------|--------------|-----------------------|---------------|------------------------------------|--------------|----------------|-------------------|-------|-----|
|      |              |          |                    |                            |                                          | ASD sample              |                       |               |                               |                        |                                   |                |                |                   |       | TD sample    |                       |               |                                    |              |                |                   |       |     |
| Year | First author | Country  | Task               | Stimulus                   | Response                                 | N<br>(male%)            | Sex<br>ratio<br>(M:F) | Age<br>(S.D.) | Diagnosis<br>criteria<br>used | SCQ                    | IQ (WISC/WAIS); PPVT/BPVS;RSPM/RM |                |                |                   |       | N<br>(male%) | Sex<br>ratio<br>(M:F) | Age<br>(S.D.) | IQ (WISC/WAIS); PPVT/BPVS; RSPM/RM |              |                |                   |       |     |
|      |              | Language | paradigm           | modality:<br>stimulus form | option                                   |                         |                       |               |                               |                        | FIQ                               | VIQ            | PIQ/           | PPVT/             | RSPM/ |              |                       |               | FIQ                                | VIQ          | PIQ/           | PPVT/             | RSPM/ |     |
|      |              |          |                    |                            |                                          |                         |                       |               |                               |                        |                                   |                | NVIQ           | BPVS              | RM    |              |                       |               |                                    |              | NVIQ           | BPVS              | RM    |     |
| 1a   | 1998         | Heaton   | The UK/<br>English | PL                         | A: isolated tone<br>V: animal<br>picture | L                       | 10<br>(100%)          | 10:0          | 9.9                           | Confirmed<br>diagnosis | N/A                               | 85.5           | N/A            | N/A               | N/A   | N/A          | 10<br>(100%)          | 10:0          | 8.1<br>(N/A)                       | N/A          | N/A            | N/A               | N/A   | N/A |
| 1b   | 1998         | Heaton   | The UK/<br>English | PM                         | A: isolated tone<br>V: animal<br>picture | L                       | 10<br>(100%)          | 10:0          | 9.9                           | Confirmed<br>diagnosis | N/A                               | 85.5           | N/A            | N/A               | N/A   | N/A          | 10<br>(100%)          | 10:0          | 8.1<br>(N/A)                       | N/A          | N/A            | N/A               | N/A   | N/A |
| 2    | 2000         | Mottron  | Canada/<br>English | PC                         | A: melodic<br>contour                    | C                       | 13<br>(84.62<br>%)    | 11:2          | 16.73<br>(6.9)                | ADI-R,<br>DSM-IV       | N/A                               | > 80           | N/A            | 106.69<br>(11.13) | N/A   | N/A          | 13<br>(100%)          | 13:0          | 15.33<br>(3.41)                    | >80          | N/A            | 105.54<br>(11.24) | N/A   | N/A |
| 3    | 2003         | Foxton   | The UK/<br>English | PC                         | A: melodic<br>contour                    | C                       | 13<br>(84.62<br>%)    | 11:2          | 18.1 (2)                      | DSM-IV                 | N/A                               | 87.9<br>(10.9) | 92.5<br>(14.5) | 83.9<br>(8.1)     | N/A   | N/A          | 15<br>(86.67%)        | 13:2          | 17.7<br>(2.2)                      | 89.1<br>(10) | 91.2<br>(10.9) | 88<br>(10.7)      | N/A   | N/A |
| 4a   | 2003         | Heaton   | The UK/<br>English | PM                         | A: isolated tone<br>V: animal<br>picture | L                       | 14<br>(N/A)           | N/A           | 10.75<br>(N/A)                | Confirmed<br>diagnosis | N/A                               | N/A            | N/A            | N/A               | 93    | 108          | 26                    | N/A           | N/A                                | N/A          | N/A            | N/A               | N/A   | N/A |
| 4b   | 2003         | Heaton   | The UK/<br>English | PCD                        | A: melodic<br>contour                    | C                       | 14<br>(N/A)           | N/A           | 10.75<br>(N/A)                | Confirmed<br>diagnosis | N/A                               | N/A            | N/A            | N/A               | 93    | 108          | 26                    | N/A           | N/A                                | N/A          | N/A            | N/A               | N/A   | N/A |



|     |      |                     |                    |     |                                                         |   |                    |      |                 |                        |     |     |     |     |                  |                  |                |      |                  |     |     |     |                   |                  |
|-----|------|---------------------|--------------------|-----|---------------------------------------------------------|---|--------------------|------|-----------------|------------------------|-----|-----|-----|-----|------------------|------------------|----------------|------|------------------|-----|-----|-----|-------------------|------------------|
| 4c  | 2003 | Heaton              | The UK/<br>English | PCD | A: melodic<br>contour                                   | C | 15                 | N/A  | 10<br>(N/A)     | Confirmed<br>diagnosis | N/A | N/A | N/A | N/A | 92               | 107              | 28             | N/A  | N/A              | N/A | N/A | N/A | N/A               | N/A              |
| 5a  | 2005 | Heaton              | The UK/<br>English | PDR | A: pitch interval                                       | C | 15                 | N/A  | 10<br>(N/A)     | Confirmed<br>diagnosis | N/A | N/A | N/A | N/A | 92               | 107              | 28             | N/A  | N/A              | N/A | N/A | N/A | N/A               | N/A              |
| 5b  | 2005 | Heaton              | The UK/<br>English | PC  | A: melodic<br>contour                                   | C | 15                 | N/A  | 10<br>(N/A)     | Confirmed<br>diagnosis | N/A | N/A | N/A | N/A | 92               | 107              | 28             | N/A  | N/A              | N/A | N/A | N/A | N/A               | N/A              |
| 6a  | 2005 | Altgassen           | The UK/<br>English | PL  | A: isolated tone<br>V: animal<br>picture                | L | 17<br>(100%)       | 17:0 | 9.34<br>(1.12)  | DSM-IV                 | N/A | N/A | N/A | N/A | 80.94<br>(18.69) | N/A              | 13<br>(100%)   | 13:0 | 9.13<br>(1.68)   | N/A | N/A | N/A | 106.15<br>(11.54) | N/A              |
| 6b  | 2005 | Altgassen           | The UK/<br>English | PCD | A: melodic<br>contour<br>V: animal<br>picture           | L | 17<br>(100%)       | 17:0 | 9.34<br>(1.12)  | DSM-IV                 | N/A | N/A | N/A | N/A | 80.94<br>(18.69) | N/A              | 13<br>(100%)   | 13:0 | 9.13<br>(1.68)   | N/A | N/A | N/A | 106.15<br>(11.54) | N/A              |
| 7   | 2007 | Järvinen-<br>Pasley | The UK/<br>English | PC  | A: melodic<br>contour                                   | C | 19<br>(84.21<br>%) | 16:3 | 11.55<br>(2.34) | DSM-IV                 | N/A | N/A | N/A | N/A | 92<br>(17.39)    | 94<br>(10.81)    | 19<br>(68.42%) | 13:6 | 11.68<br>(2.21)  | N/A | N/A | N/A | 95<br>(16.03)     | 91<br>(14.31)    |
| 8   | 2008 | Järvinen-<br>Pasley | The UK/<br>English | PCI | A: melodic<br>contour<br>V: picture of<br>pitch contour | C | 20<br>(85%)        | 17:3 | 12.55<br>(2.57) | DSM-IV                 | N/A | N/A | N/A | N/A | 84<br>(19.83)    | 87<br>(14.43)    | 20 (80%)       | 16:4 | 12.03<br>(2.62)  | N/A | N/A | N/A | 83<br>(20.11)     | 84<br>(16.12)    |
| 9   | 2008 | Heaton,<br>Davis    | The UK/<br>English | PN  | A: isolated tone                                        | C | 1<br>(100%)        | 1:0  | 35              | Confirmed<br>diagnosis | N/A | N/A | N/A | N/A | N/A              | N/A              | 9              | N/A  | 32.89<br>(14.31) | N/A | N/A | N/A | N/A               | N/A              |
| 10  | 2008 | Heaton,<br>Hudry    | The UK/<br>English | PHD | A: melodic<br>contour                                   | C | 14<br>(100%)       | 14:0 | 10.5<br>(3.96)  | ICD-10                 | N/A | N/A | N/A | N/A | 82.36<br>(18)    | N/A              | 14<br>(92.86%) | 13:1 | 10.52<br>(2.37)  | N/A | N/A | N/A | 77.71<br>(13.94)  | N/A              |
| 11a | 2008 | Heaton,<br>Walliam  | The UK/<br>English | PDR | A: pitch interval                                       | C | 32                 | N/A  | 14.5<br>(2.25)  | Confirmed<br>diagnosis | N/A | N/A | N/A | N/A | N/A              | 78.56<br>(16.19) | 35             | N/A  | 14<br>(1.5)      | N/A | N/A | N/A | N/A               | 79.54<br>(15.48) |

|     |      |                 |                |     |                                                   |   |                 |      |                 |                     |                 |                  |                  |                  |                   |                   |                |       |                |                  |                  |                  |                   |                  |
|-----|------|-----------------|----------------|-----|---------------------------------------------------|---|-----------------|------|-----------------|---------------------|-----------------|------------------|------------------|------------------|-------------------|-------------------|----------------|-------|----------------|------------------|------------------|------------------|-------------------|------------------|
|     |      |                 |                |     | V: picture of staircase                           |   |                 |      |                 |                     |                 |                  |                  |                  |                   |                   |                |       |                |                  |                  |                  |                   |                  |
|     |      |                 |                |     | A: isolated tone                                  |   |                 |      |                 |                     |                 |                  |                  |                  |                   |                   |                |       |                |                  |                  |                  |                   |                  |
| 11b | 2008 | Heaton, Walliam | The UK/English | PM  | V: picture of staircase                           | C | 32              | N/A  | 14.5<br>(2.25)  | Confirmed diagnosis | N/A             | N/A              | N/A              | N/A              | N/A               | 78.56<br>(16.19)  | 35             | N/A   | 14<br>(1.5)    | N/A              | N/A              | N/A              | N/A               | 79.54<br>(15.48) |
| 12  | 2009 | Jones           | The UK/English | PHD | A: pitch interval                                 | C | 72<br>(91.67 %) | 66:6 | 15.5<br>(0.475) | ICD-10, ADOS-G      | N/A             | 87.79<br>(17.32) | 84.31<br>(17.41) | 93.36<br>(17.44) | N/A               | N/A               | 48<br>(95.83%) | 46:2  | 15.5<br>(0.49) | 89.33<br>(21.53) | 87.25<br>(19.70) | 92.83<br>(21.15) | N/A               | N/A              |
| 13  | 2013 | Eigsti          | USA/English    | PHD | A: pitch interval                                 | C | 29<br>(86.21 %) | 25:4 | 12.3<br>(2.3)   | ADOS, ADI-R         | 23<br>(5.9)     | N/A              | 104<br>(13)      | 111<br>(14)      | N/A               | N/A               | 20 (85%)       | 17:3  | 13.7<br>(2.9)  | N/A              | 113<br>(12)      | 115<br>(12)      | N/A               | N/A              |
| 14a | 2014 | Stanutz         | Canada/English | PHD | A: pitch interval                                 | C | 25<br>(76%)     | 19:6 | 10.67<br>(N/A)  | DSM-IV              | N/A             | >70              | N/A              | N/A              | N/A               | N/A               | 25 (44%)       | 11:14 | 10.42<br>(N/A) | N/A              | N/A              | N/A              | N/A               | N/A              |
| 14b | 2014 | Stanutz         | Canada/English | PC  | A: melodic contour                                | C | 25<br>(76%)     | 19:6 | 10.67<br>(N/A)  | DSM-IV              | N/A             | >70              | N/A              | N/A              | N/A               | N/A               | 25 (44%)       | 11:14 | 10.42<br>(N/A) | N/A              | N/A              | N/A              | N/A               | N/A              |
| 14c | 2014 | Stanutz         | Canada/English | PM  | A: melodic contour                                | C | 25<br>(76%)     | 19:6 | 10.67<br>(N/A)  | DSM-IV              | N/A             | >70              | N/A              | N/A              | N/A               | N/A               | 25 (44%)       | 11:14 | 10.42<br>(N/A) | N/A              | N/A              | N/A              | N/A               | N/A              |
| 15a | 2015 | Jiang           | China/Mandarin | PC  | A: melodic contour                                | C | 17              | N/A  | 9.41<br>(3.03)  | DSM-5 (2013)        | 24.29<br>(6.78) | N/A              | N/A              | N/A              | 116.06<br>(27.17) | 119.12<br>(13.77) | 17             | N/A   | 9.16<br>(2.76) | N/A              | N/A              | N/A              | 148.71<br>(16.66) | 122.24<br>(8.5)  |
| 15b | 2015 | Jiang           | China/Mandarin | PCI | A: melodic contour<br>V: picture of pitch contour | C | 17              | N/A  | 9.41<br>(3.03)  | DSM-5 (2013)        | 24.29<br>(6.78) | N/A              | N/A              | N/A              | 116.06<br>(27.17) | 119.12<br>(13.77) | 17             | N/A   | 9.16<br>(2.76) | N/A              | N/A              | N/A              | 148.71<br>(16.66) | 122.24<br>(8.5)  |

|     |      |            |                     |     |                       |   |                    |      |                  |                               |                |                   |                   |                   |                   |     |                |      |                 |                  |                   |                  |                   |     |
|-----|------|------------|---------------------|-----|-----------------------|---|--------------------|------|------------------|-------------------------------|----------------|-------------------|-------------------|-------------------|-------------------|-----|----------------|------|-----------------|------------------|-------------------|------------------|-------------------|-----|
| 16a | 2015 | Globerson  | Israel/<br>Hebrew   | PDR | A: pitch interval     | C | 20<br>(100%)       | 20:0 | 28.8<br>(6.8)    | ADOS                          | N/A            | N/A               | N/A               | N/A               | N/A               | N/A | 32<br>(100%)   | 32:0 | 26.2<br>(3.5)   | N/A              | N/A               | N/A              | N/A               | N/A |
| 16b | 2015 | Globerson  | Israel/<br>Hebrew   | PHD | A: pitch interval     | C | 20<br>(100%)       | 20:0 | 28.8<br>(6.8)    | ADOS                          | N/A            | N/A               | N/A               | N/A               | N/A               | N/A | 32<br>(100%)   | 32:0 | 26.2<br>(3.5)   | N/A              | N/A               | N/A              | N/A               | N/A |
| 17a | 2016 | Mayer      | The UK/<br>English  | PHD | A: melodic<br>contour | C | 14<br>(92.86<br>%) | 13:1 | 13.8<br>(1.96)   | Confirmed<br>diagnosis        | N/A            | N/A               | N/A               | N/A               | 71.50<br>(22.94)  | N/A | 14<br>(100%)   | 14:0 | 13.53<br>(0.88) | N/A              | N/A               | N/A              | 100.07<br>(16.14) | N/A |
| 17b | 2016 | Mayer      | The UK/<br>English  | PHD | A: melodic<br>contour | C | 19<br>(78.95<br>%) | 15:4 | 40.23<br>(11.33) | DSM-IV,<br>ADOS               | N/A            | 113.37<br>(15.27) | 111.16<br>(15.57) | 112.95<br>(12.97) | 105.63<br>(12.07) | N/A | 19<br>(78.95%) | 15:4 | 38.26<br>(9.05) | N/A              | N/A               | N/A              | 106.05<br>(10.24) | N/A |
| 18  | 2017 | Cheng      | China/<br>Cantonese | PHD | A: pitch interval     | C | 20<br>(85%)        | 17:3 | 25<br>(3.22)     | DSM-III,<br>ICD-10,<br>ADOS-2 | N/A            | N/A               | N/A               | N/A               | N/A               | N/A | 20 (85%)       | 17:3 | 24<br>(3.6)     | N/A              | N/A               | N/A              | N/A               | N/A |
| 19  | 2019 | Germain    | Canada/<br>English  | PDR | A: pitch interval     | C | 17<br>(100%)       | 17:0 | 13.7<br>(2.3)    | DSM-IV,<br>ADOS               | N/A            | 110.8<br>(18.3)   | N/A               | N/A               | N/A               | N/A | 19<br>(42.11%) | 8:11 | 12.9<br>(2.3)   | 115.8<br>(8.1)   | N/A               | N/A              | N/A               | N/A |
| 20  | 2019 | Schelinski | German/<br>Germany  | PC  | A: melodic<br>contour | C | 16<br>(81.25<br>%) | 13:3 | 33.75<br>(10.12) | ICD-10,<br>ADOS,<br>ADI-R     | 20.33<br>(5.7) | 110.31<br>(13.79) | 110.75<br>(12.35) | 107.38<br>(17.55) | N/A               | N/A | 16<br>(81.25%) | 13:3 | 33.69<br>(9.58) | 111.5<br>(10.97) | 108.75<br>(12.59) | 112.69<br>(9.59) | N/A               | N/A |
| 21  | 2019 | Jamey      | Canada/<br>English  | PC  | A: melodic<br>contour | C | 19<br>(100%)       | 19:0 | 10.4<br>(1.6)    | ADOS,<br>ADI-R                | 19.5<br>(5.2)  | 118.6<br>(14.5)   | 114.8<br>(13.3)   | 119.4<br>(17)     | N/A               | N/A | 21<br>(100%)   | 21:0 | 9.8<br>(1.8)    | 122.2<br>(11.2)  | 115.1<br>(12)     | 122.9<br>(15.41) | N/A               | N/A |
| 22  | 2021 | Weiss      | Canada/<br>English  | PM  | A: melodic<br>contour | C | 26<br>(84.62<br>%) | 22:4 | 11.1<br>(1.4)    | DSM-IV                        | N/A            | N/A               | N/A               | N/A               | N/A               | N/A | 26<br>(88.46%) | 23:3 | 10.7<br>(1.5)   | N/A              | N/A               | N/A              | N/A               | N/A |

Note: (1) Abbreviations: PC = pitch contour discrimination task; PCI = pitch contour identification task; PCD = pitch chord disembedding task; PDR = pitch direction recognition task; PHD = pitch height discrimination task; PL: pitch labelling task; PM = pitch memory task; PN= pitch naming task; A = auditory; V = visual; C = choice; L = labeling;

ASD = autism spectrum disorder; TD = typically developing people; DSM = Diagnostic and Statistical Manual of Mental Disorders; ADOS = Autism Diagnostic Observation Schedule; ADI-R = Autism Diagnostic Interview-Revised; ICD = International and Statistical Classification of Diseases and Related Health Problems; WAIS = Wechsler Adult Intelligence Scale/Wechsler Abbreviated Scale of Intelligence; WISC = Wechsler Intelligence Scale for children; FIQ = Full-Scale IQ; VIQ = Verbal IQ; PIQ = Performance IQ; PPVT = Peabody Picture Vocabulary Test; BPVS = British Picture Vocabulary Scale; RSPM = Raven's Standard Progressive Matrices; RM = Raven's Matrices; M = male; F = female; SCQ = Social Communication Questionnaire; N/A = not available; M = mean value; SD = standard deviation. (2) Information on study characteristics involves only the tasks included into the review.

**Supplemental Table 3. Overall pitch processing performance (accuracy) of participants with ASD.**

|     | Year | First author    | Hedges <i>g</i> (Variance) | SE<br>( <i>g</i> ) | 95% CI         | Type of participants<br>(number) | Task paradigm | Quality<br>index<br>score | Main Results |        |                 |
|-----|------|-----------------|----------------------------|--------------------|----------------|----------------------------------|---------------|---------------------------|--------------|--------|-----------------|
|     |      |                 |                            |                    |                |                                  |               |                           | Mean (SD)*   |        | Effect of group |
|     |      |                 |                            |                    |                |                                  |               |                           | ASD          | TD     |                 |
| 1a  | 1998 | Heaton          | 1.461 (0.2582)             | 0.508              | [0.465,2.457]  | ASD (10)-TD (10)                 | PL            | 0.82                      | 11.7         | 5.8    | ▲               |
| 1b  | 1998 | Heaton          | 1.2978 (0.2459)            | 0.496              | [0.326,2.270]  | ASD (10)-TD (10)                 | PM            | 0.82                      | 8.9          | 4      | ▲               |
| 2   | 2000 | Mottron         | 0.6591 (0.1628)            | 0.403              | [-0.132,1.450] | ASD (13)-TD (13)                 | PC            | 0.91                      | 67.92        | 56.64  | ●               |
| 3   | 2003 | Foxton          | -0.0074 (0.1436)           | 0.379              | [-0.75,0.735]  | ASD (13)-TD (15)                 | PC            | 0.86                      | 12.222       | 12.24  | ●               |
| 4a  | 2003 | Heaton          | 0.907 (0.121)              | 0.347              | [0.226,1.288]  | ASD (14)-TD (26)                 | PM            | 0.81                      | 11.21        | 6.355  | ▲               |
| 4b  | 2003 | Heaton          | 0.6474 (0.1153)            | 0.340              | [-0.018,1.313] | ASD (14)-TD (26)                 | PCD           | 0.81                      | 7.5          | 4      | ▲               |
| 4c  | 2003 | Heaton          | 0.4022 (0.1043)            | 0.323              | [-0.231,1.035] | ASD (15)-TD (28)                 | PCD           | 0.81                      | F = 1.64     |        | ●               |
| 5a  | 2005 | Heaton          | 0.4753 (0.1051)            | 0.324              | [-0.16,1.111]  | ASD (15)-TD (28)                 | PDR           | 0.81                      | 12.49        | 11.35  | ●               |
| 5b  | 2005 | Heaton          | 0.1477 (0.1026)            | 0.320              | [-0.48,0.776]  | ASD (15)-TD (28)                 | PC            | 0.81                      | 6.33         | 6.09   | ●               |
| 6a  | 2005 | Altgassen       | -0.3478 (0.1379)           | 0.371              | [-1.076,0.380] | ASD (17)-TD (13)                 | PL            | 0.86                      | 3.29         | 4.23   | ●               |
| 6b  | 2005 | Altgassen       | 0.2333 (0.1367)            | 0.370              | [-0.491,0.958] | ASD (17)-TD (13)                 | PCD           | 0.86                      | 3.15         | 2.73   | ●               |
| 7   | 2007 | Järvinen-Pasley | -0.2573 (0.1062)           | 0.326              | [-0.896,0.381] | ASD (19)-TD (19)                 | PC            | 0.86                      | t = - 0.81   |        | ●               |
| 8   | 2008 | Järvinen-Pasley | 0.7253 (0.1068)            | 0.327              | [0.085,1.366]  | ASD (20)-TD (20)                 | PCI           | 0.86                      | t = 2.34     |        | ▲               |
| 9   | 2008 | Heaton, Davis   | 1.6986 (1.2879)            | 1.135              | [-0.526,3.923] | ASD (1)-TD (9)                   | PN            | 0.68                      | 152          | 117.21 | ▲               |
| 10  | 2008 | Heaton, Hudry   | 1.2704 (0.1734)            | 0.417              | [0.454,2.087]  | ASD (14)-TD (14)                 | PHD           | 0.91                      | 34           | 24.9   | ▲               |
| 11a | 2008 | Heaton, Walliam | -0.0704 (0.0599)           | 0.245              | [-0.550,0.409] | ASD (32)-TD (35)                 | PDR           | 0.91                      | 12.27        | 12.85  | ●               |
| 11b | 2008 | Heaton, Walliam | 0.1703 (0.060)             | 0.245              | [-0.310,0.651] | ASD (32)-TD (35)                 | PM            | 0.91                      | 15.34        | 13.78  | ●               |
| 12  | 2009 | Jones           | -0.2209 (0.0349)           | 0.187              | [-0.587,0.145] | ASD (72)-TD (48)                 | PHD           | 0.95                      | 1.02         | 1.12   | ●               |
| 13  | 2013 | Eigsti          | 0.336 (0.0857)             | 0.293              | [-0.238,0.910] | ASD (29)-TD (20)                 | PHD           | 0.91                      | F = 1.38     |        | ▲               |
| 14a | 2014 | Stanutz         | 0.1922 (0.0804)            | 0.284              | [-0.364,0.748] | ASD (25)-TD (25)                 | PHD           | 0.86                      | 9.06         | 8.12   | ●               |

|      |              |                            |                    |        |                                  |                  |                           |            | Main Results |                 |   |
|------|--------------|----------------------------|--------------------|--------|----------------------------------|------------------|---------------------------|------------|--------------|-----------------|---|
| Year | First author | Hedges <i>g</i> (Variance) | SE<br>( <i>g</i> ) | 95% CI | Type of participants<br>(number) | Task paradigm    | Quality<br>index<br>score | Mean (SD)* |              | Effect of group |   |
|      |              |                            |                    |        |                                  |                  |                           | ASD        | TD           |                 |   |
| 14b  | 2014         | Stanutz                    | 0.598 (0.0837)     | 0.289  | [0.031,1.165]                    | ASD (25)-TD (25) | PC                        | 0.86       | 9.76         | 8.12            | ▲ |
| 14c  | 2014         | Stanutz                    | 0.6292 (0.0841)    | 0.290  | [0.061,1.198]                    | ASD (25)-TD (25) | PM                        | 0.86       | 12.25        | 10.17           | ▲ |
| 15a  | 2015         | Jiang                      | 0.4795 (0.1212)    | 0.348  | [-0.203,1.162]                   | ASD (17)-TD (17) | PC                        | 0.77       | F = 2.05     |                 | ● |
| 15b  | 2015         | Jiang                      | 0.8545 (0.1289)    | 0.359  | [0.151,1.558]                    | ASD (17)-TD (17) | PCI                       | 0.77       | F = 6.51     |                 | ▲ |
| 16a  | 2015         | Globerson                  | -0.0078 (0.0813)   | 0.285  | [-0.567,0.551]                   | ASD (20)-TD (32) | PDR                       | 0.91       | 44.9         | 45.4            | ● |
| 16b  | 2015         | Globerson                  | 0.1098 (0.0814)    | 0.285  | [-0.449,0.669]                   | ASD (20)-TD (32) | PHD                       | 0.91       | 25.7         | 21.47           | ● |
| 17a  | 2016         | Mayer                      | 0.3654 (0.1454)    | 0.381  | [-0.382,1.113]                   | ASD (14)-TD (14) | PHD                       | 0.95       | 32           | 29              | ● |
| 17b  | 2016         | Mayer                      | -0.3747 (0.1072)   | 0.327  | [-1.016,0.267]                   | ASD (19)-TD (19) | PHD                       | 0.95       | 32.52        | 35.21           | ● |
| 18   | 2017         | Cheng                      | -0.0432 (0.1)      | 0.316  | [-0.663,0.577]                   | ASD (20)-TD (20) | PHD                       | 0.91       | 21.91        | 22.14           | ● |
| 19   | 2019         | Germain                    | 0.0462 (0.1115)    | 0.334  | [-0.608,0.701]                   | ASD (17)-TD (19) | PDR                       | 0.86       | F = 0.02     |                 | ● |
| 20   | 2019         | Schelinski                 | -0.4108 (0.1278)   | 0.358  | [-1.111,0.290]                   | ASD (16)-TD (16) | PC                        | 0.91       | 44.43        | 46.202          | ● |
| 21   | 2019         | Jamey                      | 0.254 (0.1011)     | 0.318  | [-0.369,0.877]                   | ASD (19)-TD (21) | PC                        | 0.86       | F = 0.67     |                 | ● |
| 22   | 2021         | Weiss                      | -0.8025 (0.0833)   | 0.289  | [-1.368, -0.237]                 | ASD (26)-TD (26) | PM                        | 0.91       | 0.45         | 0.63            | ▲ |

Note: (1) Negative effect size Hedge's *g* indicates lower accuracy in ASD participants compared to TD controls; (2) ASD = autism spectrum disorder; TD = typical developing people; ▲ = significant difference ( $p < 0.05$ ); ● = non-significant difference; (3) The data were collected based on the accuracy rate reported in the included studies.

\**F* values or *t* values are presented when means and SDs were not reported.

**Supplemental Table 4. Results of the meta-regression analyses.**

| <b>Moderator</b>           | <b>Coefficient (<math>\beta</math>)</b> | <b>95% CI</b>   | <b><i>p</i> value</b> |
|----------------------------|-----------------------------------------|-----------------|-----------------------|
| <b>Participant-related</b> |                                         |                 |                       |
| Mean age                   | -0.02                                   | -0.04 to -0.004 | 0.02*                 |
| Percentage of men          | 1.17                                    | -1.20 to 3.54   | 0.33                  |
| Full-scale IQ              | -0.02                                   | -0.05 to 0.01   | 0.18                  |
| Verbal IQ                  |                                         |                 |                       |
| WASI                       | 0.005                                   | -0.02 to 0.03   | 0.65                  |
| PPVT/BPVS                  | 0.001                                   | -0.02 to 0.02   | 0.91                  |
| Non-verbal IQ              |                                         |                 |                       |
| WASI                       | 0.009                                   | -0.02 to 0.03   | 0.51                  |
| RSPM/RM                    | 0.01                                    | 0.001 to 0.03   | 0.03*                 |
| AQ                         | -0.04                                   | -0.10 to 0.02   | 0.18                  |
| SCQ                        | 0.14                                    | -0.02 to 0.29   | 0.08                  |
| <b>Language background</b> |                                         |                 |                       |
| Non-tonal                  |                                         | Reference       |                       |
| tonal                      | 0.16                                    | -0.42 to 0.74   | 0.58                  |
| <b>Methodology-related</b> |                                         |                 |                       |
| Task type                  |                                         |                 |                       |
| PC                         |                                         | Reference       |                       |
| PCD                        | 0.25                                    | -0.41 to 0.91   | 0.46                  |
| PCI                        | 0.60                                    | -0.17 to 1.37   | 0.13                  |
| PDR                        | -0.09                                   | -0.66 to 0.49   | 0.77                  |
| PHD                        | -0.03                                   | -0.51 to 0.44   | 0.89                  |
| PL                         | 0.21                                    | -0.65 to 1.06   | 0.64                  |
| PM                         | 0.15                                    | -0.40 to 0.70   | 0.59                  |
| PN                         | 1.51                                    | -0.85 to 3.87   | 0.21                  |

|                                      |         |                 |        |
|--------------------------------------|---------|-----------------|--------|
| <b>Stimulus form</b>                 |         |                 |        |
| Isolated tone                        |         | Reference       |        |
| Pitch interval                       | -0.53   | -1.05 to -0.01  | 0.046* |
| Melodic contour                      | -0.32   | -0.81 to 0.16   | 0.19   |
| <b>Stimulus modality</b>             |         |                 |        |
| Auditory                             |         | Reference       |        |
| Audiovisual                          | 0.30    | -0.67 to 0.67   | 0.11   |
| <b>Number of trials</b>              | -0.0004 | -0.004 to 0.003 | 0.83   |
| <b>Number of answer options</b>      | 0.04    | -0.06 to 0.14   | 0.46   |
| <b>Absolute pitch/Relative pitch</b> |         |                 |        |
| Absolute pitch                       |         | Reference       |        |
| Relative pitch                       | -0.25   | -0.60 to 0.09   | 0.15   |
| <b>Study-related</b>                 |         |                 |        |
| <b>Year of publication</b>           | -0.04   | -0.06 to -0.01  | 0.004* |
| <b>Region</b>                        |         |                 |        |
| Asia                                 |         | Reference       |        |
| North America                        | -0.03   | -0.57 to 0.51   | 0.92   |
| Europe                               | 0.03    | -0.45 to 0.51   | 0.90   |

Note: CI = confidence interval; PC = pitch contour discrimination task; PCI = pitch contour identification task; PCD = pitch chord disembedding task; PDR = pitch direction recognition task; PHD = pitch height discrimination task; PL = pitch labelling task; PM = pitch memory task; PN = pitch naming task; \*\* $p < 0.05$ .
